# Supplementary material for: Evaluation of Ultrasound and Enzymatic Modified Silkworm Pupae Protein as a Partial Casein Substitute in Sweet Mozzarella Cheese Analogues: Impact on Physicochemical, Rheological, and Sensory Properties
Source: Research Square preprint supplement (doi:10.21203/rs.3.rs-7614213/v1), 2025-10-16
Supplement: Supplementary file 1 [file a765da2af7c751745110d8de.docx]

**Highlights**

- Silkworm pupae protein,both native, ultrasound-modified, and enzyme-modified, was effectively utilized as a partial replacer for rennet casein in sweet Mozzarella cheese analogues, demonstrating improved functional properties and sustainability potential.
- Partial substitution (0%, 10%, 20%) significantly impacted the cheese’s gross composition, resulting in increased dry matter and fat and progressively reduced protein content, with mineral content remaining unaffected.
- Protein modification via ultrasound and enzymatic hydrolysis improved elasticity and firmness at lower substitution levels and increased gumminess and adhesiveness, positively influencing the textural profile of Mozzarella analogues.
- Meltability and flowability showed a slight but significant decrease at higher silkworm protein substitution levels; however, ultrasound modification helped maintain meltability and sensory quality within acceptable ranges.
- Rheological analysis displayed a decrease in storage and loss moduli and consistency index as silkworm protein levels increased, suggesting structural changes in the cheese network, while modifications preserved desirable viscoelastic properties.
- Substitution led to modest reductions in whiteness and yellowness; nonetheless, all samples remained within typical appearance specifications for consumer-acceptable Mozzarella analogues.
- The study highlights the potential of modified silkworm pupae protein as a sustainable protein source for dairy product innovation, supporting the development of high-quality cheese analogues and diversification within the circular bioeconomy.
